# Supplementary material for: RSV healthcare burden in adults before and since the emergence of the COVID-19 pandemic in 6 European countries
Source: bioRxiv or medRxiv preprint supplement (doi:10.1101/2024.09.20.24314093), 2024-09-23
Supplement: Supplementary file [file media-2.pdf]

**Denmark**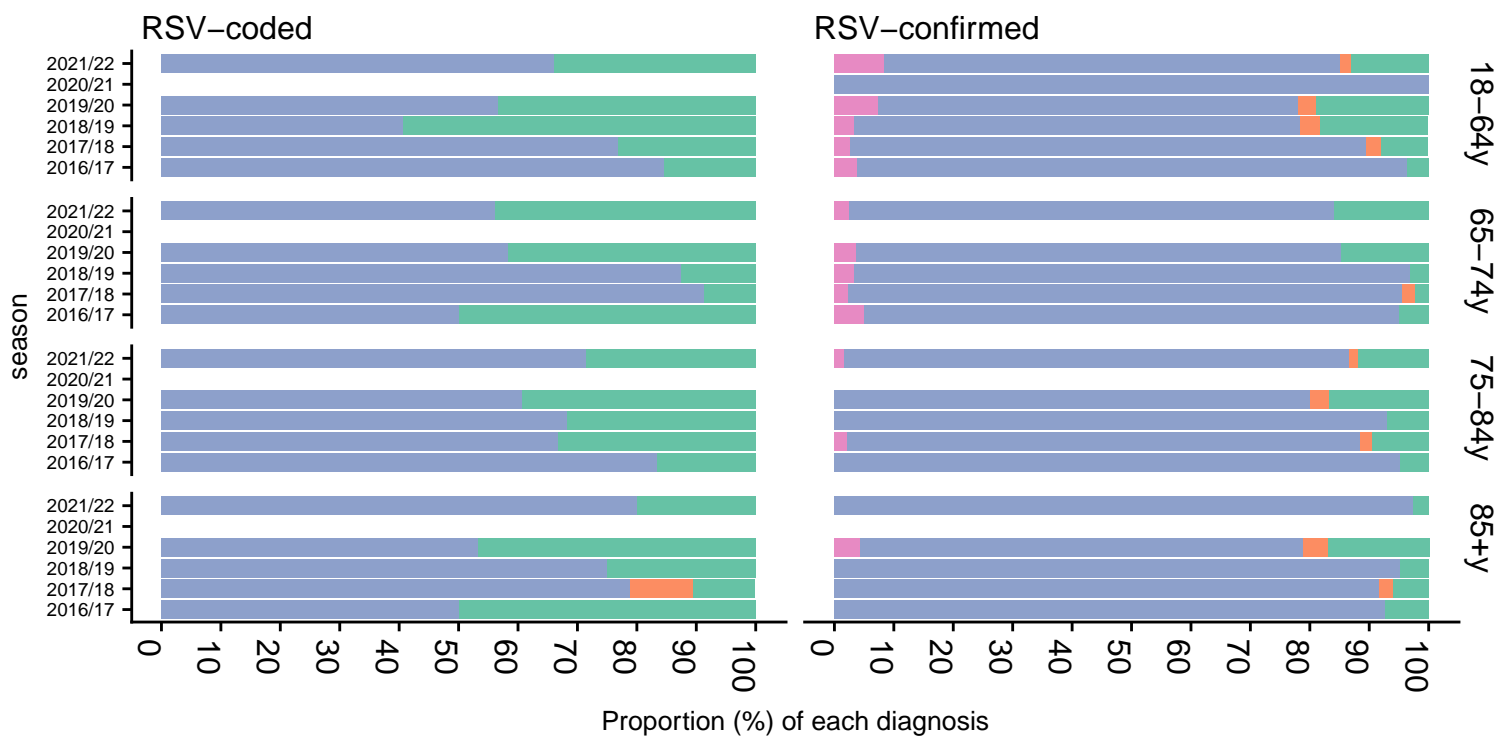**England**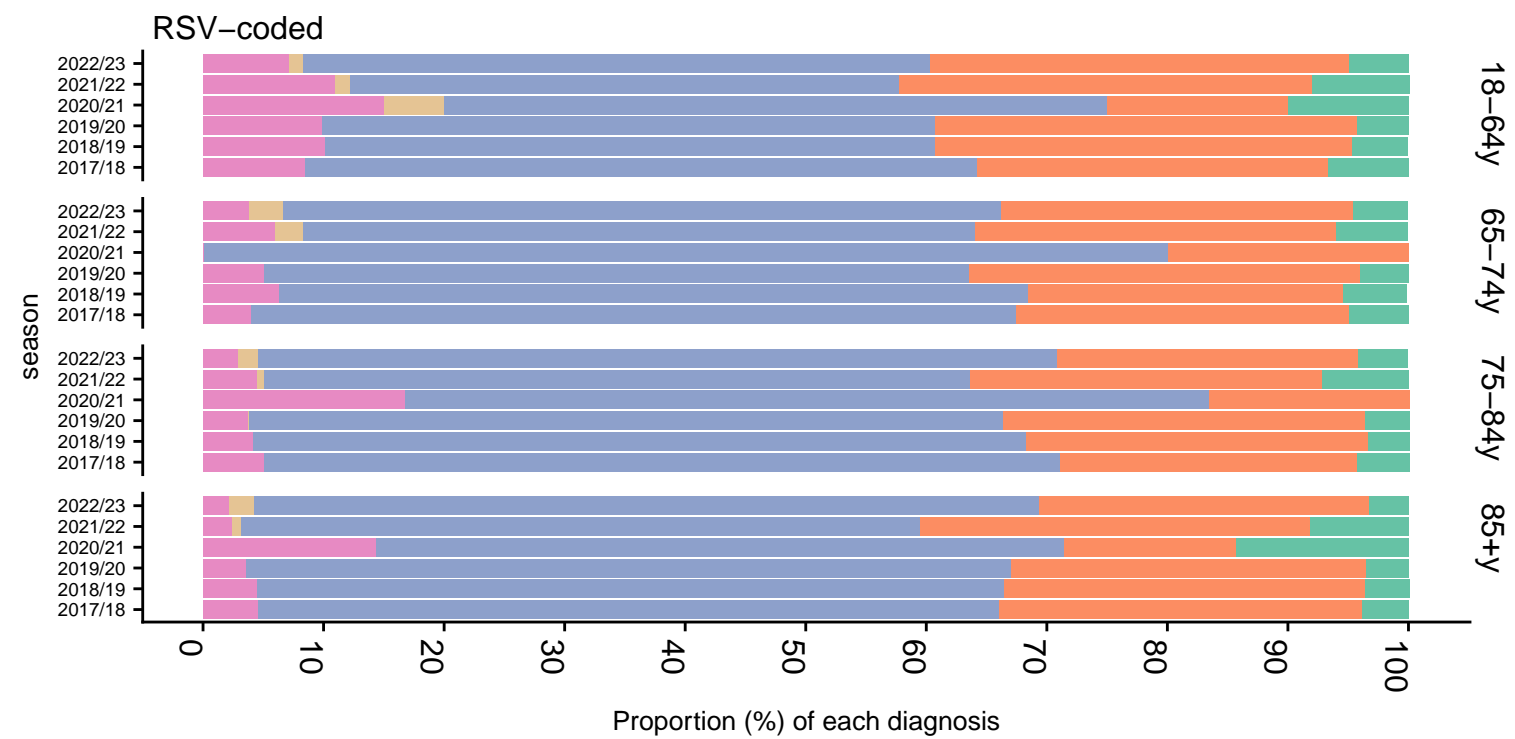**Finland**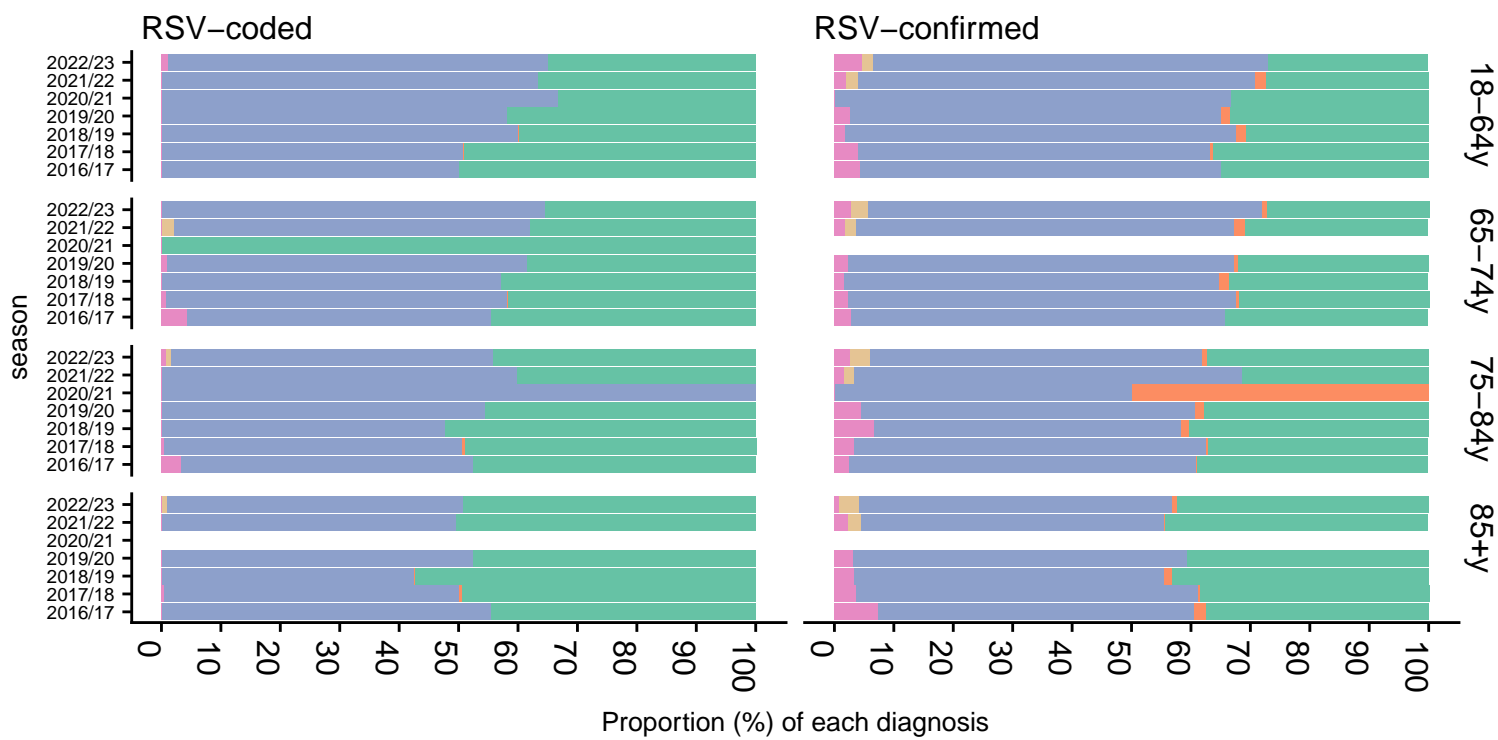**Netherlands**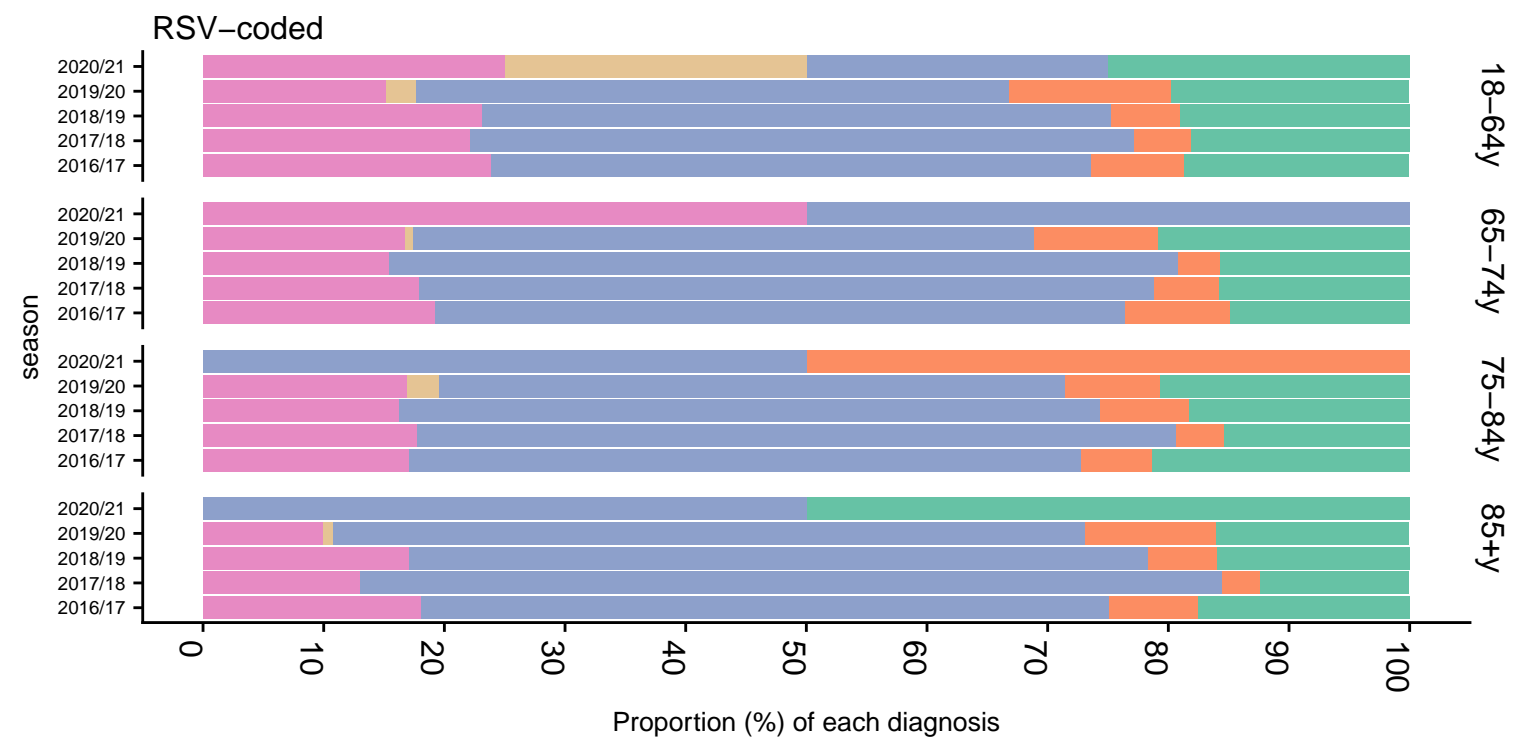**Scotland**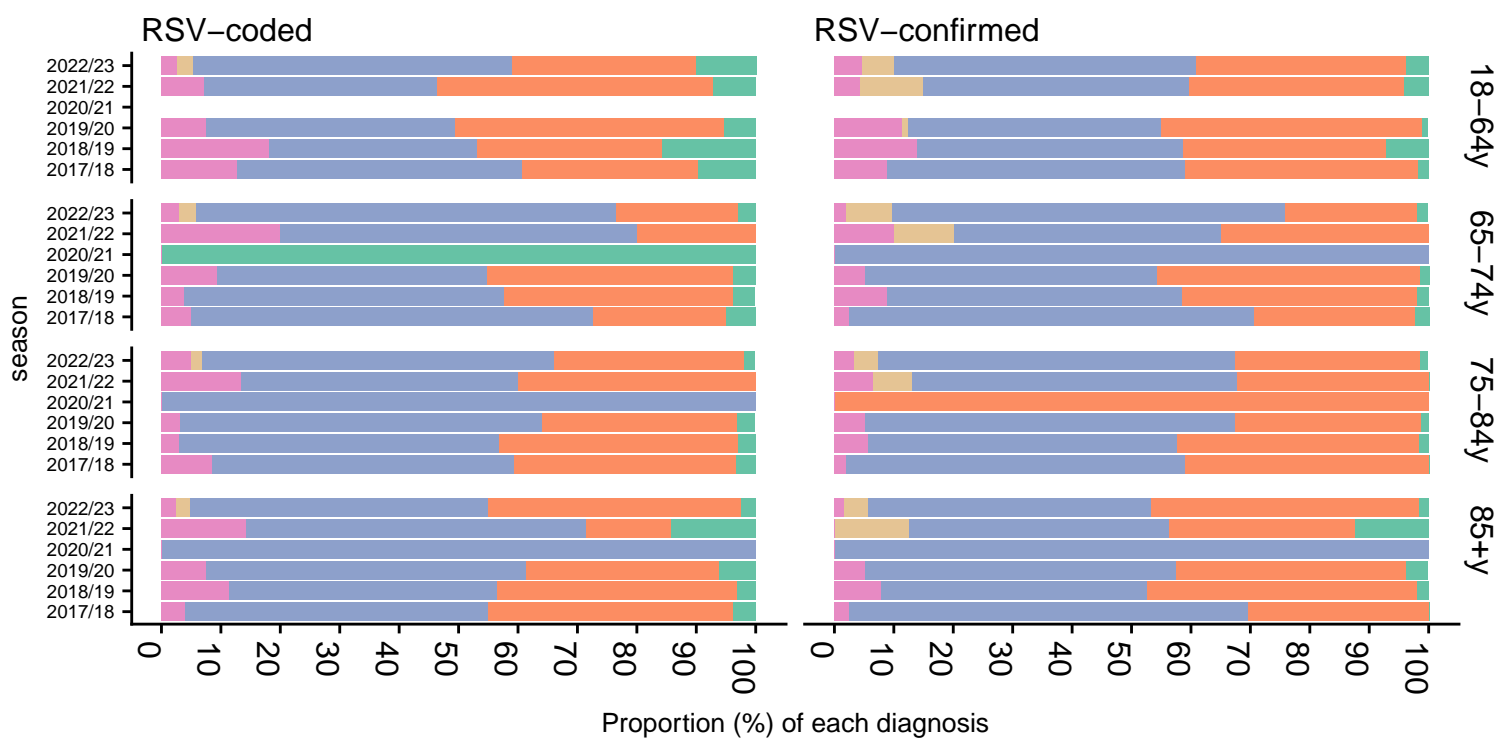**Spain-Valencia**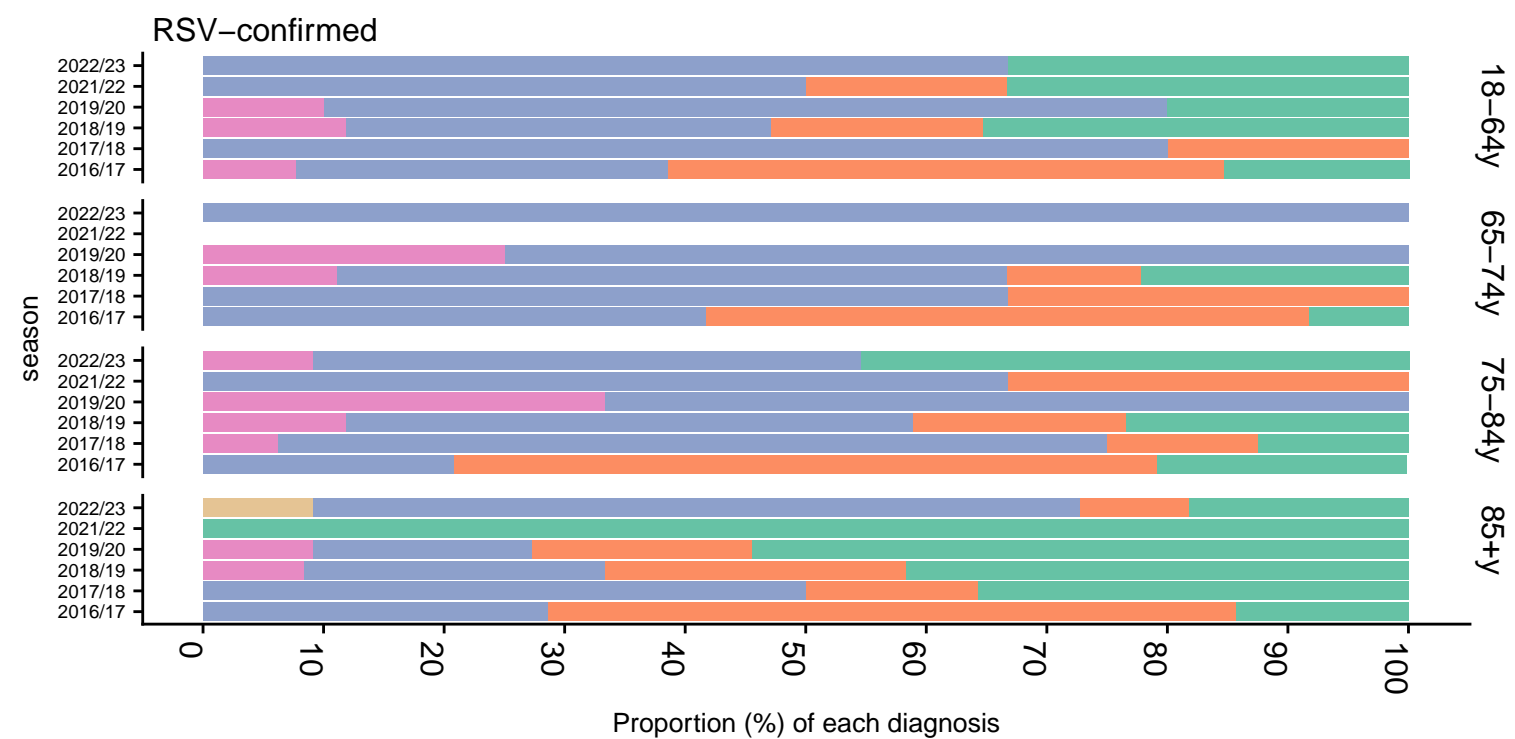

Diagnosis ■ Bronchitis & Bronchiolitis ■ Unsp. LRTI ■ Pneumonia & Influenza ■ Sarscov-2 ■ URTI
