# Supplementary material for: RSV healthcare burden in adults before and since the emergence of the COVID-19 pandemic in 6 European countries
Source: bioRxiv or medRxiv preprint supplement (doi:10.1101/2024.09.20.24314093), 2024-09-23
Supplement: Supplementary file [file media-5.pdf]

Hospital admission rates  
per 100,000 p-y

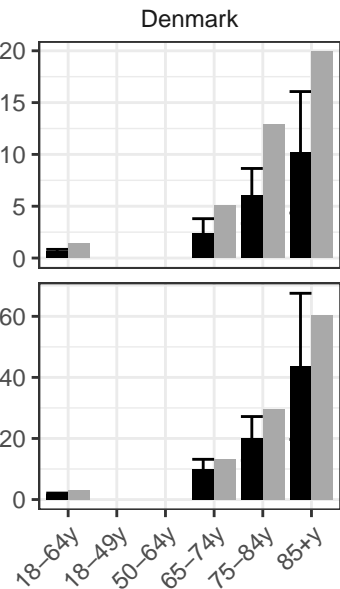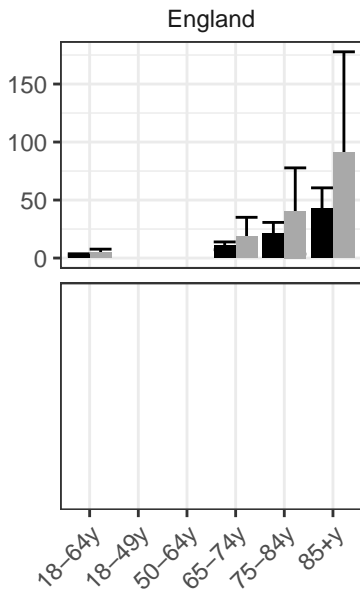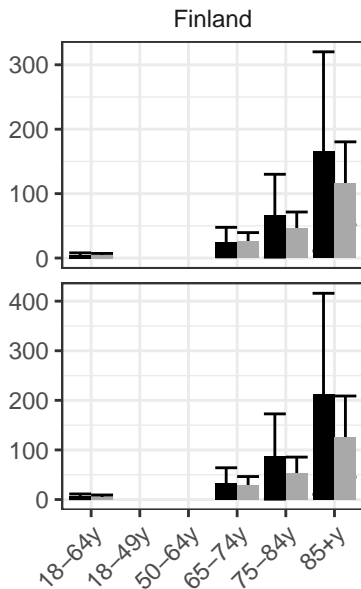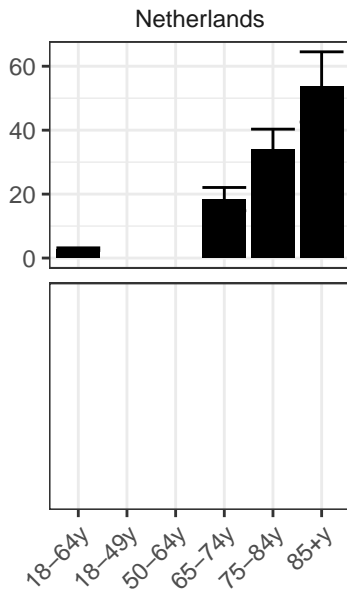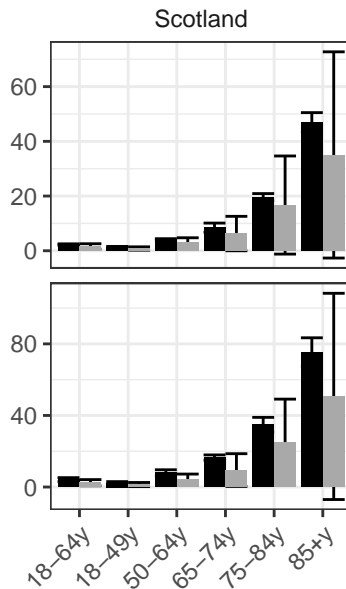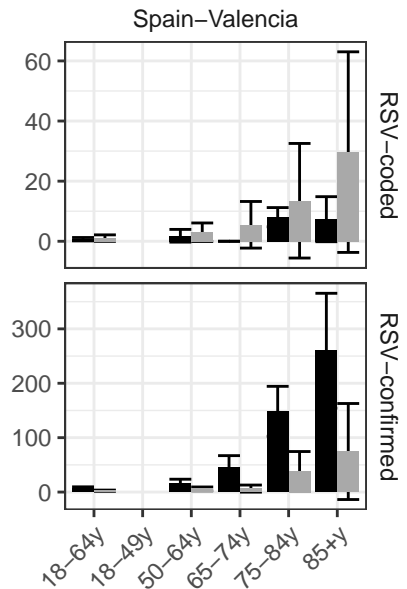

Age group

Color  Before-COVID19  During-COVID19

RSV-coded

RSV-confirmed
